# Supplementary material for: Atmospheric self-evolution and hydrogen storage of Mg 80 Ni 20 H x induced by wet ball milling
Source: Royal Society of Chemistry journal article supplement (doi:10.1039/d5se01430a), 2025-12-13
Supplement: d5se01430a1.pdf [file d5se01430a1.pdf]

## Supplementary Information

### **Atmospheric self-evolution and hydrogen storage of $\text{Mg}_{80}\text{Ni}_{20}\text{H}_x$ induced by wet ball milling**

**Jialing Gu<sup>a</sup>, Suhang He<sup>a</sup>, Ruoyu Ma<sup>a</sup>, Kai Liu<sup>a</sup>, Mengran Li<sup>a</sup>, Yunfeng Zhu<sup>a\*</sup>,**

**Rui Shi<sup>a\*</sup>, Yao Zhang<sup>b</sup>, Jiguang Zhang<sup>a</sup>, Yana Liu<sup>a</sup>, Zhixin Ba<sup>c</sup>, Jun Wang<sup>a</sup>**

*a College of Materials Science and Engineering, Jiangsu Collaborative Innovation  
Centre for Advanced Inorganic Function Composites, Nanjing Tech University,  
Nanjing 211816, PR. China*

*b School of Materials Science and Engineering, Southeast University, Nanjing  
211189, PR. China*

*c School of Materials Science and Engineering, Nanjing Institute of Technology,  
Nanjing 211167, PR China*

**\*Corresponding authors:**

**Prof. Yunfeng Zhu; Email: yfzhu@njtech.edu.cn**

**Dr. Rui Shi; E-mail: three@njtech.edu.cn**

## Experimental methods

### Raw Materials

The following chemicals were used as received commercially without any further purification: Mg powder ( $\geq 99\%$ , WeiHao Magnesium Powder,  $< 44\ \mu\text{m}$ ), Ni powder ( $\geq 99.9\%$ , Jiangyou Hebao Nanomaterial Co.,  $< 2\ \mu\text{m}$ ), acetone ( $\geq 99.5\%$ , Shanghai Lingfeng Chemical Reagent Co.).

### Sample preparation

Mg-Ni based hydride composites were manufactured by hydriding combustion synthesis (HCS) method. Briefly, the Mg powder and Ni powder were mixed at 80: 20 molar ratio, and then the mixed powder was blended with acetone and dispersed by ultrasound for 1 h. After that, the mixture was dried for 10 h. The as-obtained powder mixture was put into a combustion synthesis furnace, and heated at  $535\ ^\circ\text{C}$  for 1 h under 2 MPa hydrogen atmosphere, then cooled down to  $340\ ^\circ\text{C}$  and held for 4 h under 2 MPa hydrogen atmosphere to obtain  $\text{Mg}_{80}\text{Ni}_{20}\text{H}_x$ .

Then, as-synthesized  $\text{Mg}_{80}\text{Ni}_{20}\text{H}_x$  was partially dry milled and partially wet milled, respectively. In particular, the dry ball milling process was set with a ball to material ratio of 30:1 and a milling speed of 400 rpm, while the wet milling process was set with the same ball to material ratio and milling speed, adding 2 mL of acetone as solvent during milling. After wet ball milling, the samples were oven dried at  $60^\circ\text{C}$ . The as-synthesized samples were then exposed to ambient atmosphere for varying periods of time.

## Characterizations

X-ray diffraction (XRD, ARL X'TRA diffractometer, Cu-K $\alpha$  radiation) was used to analyze the phase structure of the samples. The micromorphology was observed by field-emission scanning electron microscopy (FESEM) and high-resolution transmission electron microscopy (HRTEM). The programmed temperature-raising desorption (TPD) and hydrogen absorption/desorption kinetic experiments were measured on a sieverts-type device (GRC, Advanced Materials Co.). For TPD experiments, the samples were heated from room temperature to 360 °C at a heating rate of 10 °C/min. For the isothermal hydrogen absorption/desorption kinetics experiments, the initial hydrogen pressures for hydrogen absorption/desorption were 3 MPa and 0.005 MPa, respectively. The samples were analyzed by differential scanning calorimetry (DSC, TA Q2000) to investigate the hydrogen desorption behavior. About 5 mg of the sample was loaded into a ceramic crucible and then heated to 500 °C under argon atmosphere at a flow rate of 50 ml/min.
